**TITLE:** O<sub>2</sub> DELIVERY (DO<sub>2</sub>) AND O<sub>2</sub> CONSUMPTION (VO<sub>2</sub>) UNDER GENERAL ANESTHESIA AND HEMODILUTION.  
**AUTHORS:** G. Janvier, M.D., H. Guenard, M.D., S. Winnock, M.D., A. Vallet, M.D., G. Dugrais, M.D.  
**AFFILIATION:** Anes. Dept. Ph. Erny, Pellegrin Hospital, 33076 Bordeaux, France.

General anesthesia modifies the DO<sub>2</sub>-VO<sub>2</sub> relationship compared to conscious state (1). It reduces the DO<sub>2</sub> and participates in an increase in cellular O<sub>2</sub> Ext. It appears to react by reducing general metabolism, which decreases VO<sub>2</sub>. Consequently VO<sub>2</sub> is maintained at low level of DO<sub>2</sub>. Are these relationships perturbed by other parameters which act on DO<sub>2</sub>?

We have studied the role of intraoperative normal acute hemodilution on the VO<sub>2</sub>-DO<sub>2</sub> relationship. We have anesthetized, paralyzed and ventilated 15 patients undergoing abdominal aortic surgery (informed consent and approval by the ethic committee of Pellegrin Hosp., Bordeaux, France). Right heart catheterism allowed us to measure pressures (MPAP, RAP, PcwP) and CO by thermodilution. The MAP was continuously measured through a radial catheter. Hemodynamic measures were coupled with arterial and venous blood withdrawals for O<sub>2</sub> Sat., O<sub>2</sub> content, O<sub>2</sub> capacity, lactic acid and Hte. The calculation of the VO<sub>2</sub> and DO<sub>2</sub> were corrected by the Moreno Statistical Method in order to limit any effect on common variables by errors.

Out of the 15 patients, 7 controls underwent a series of measurements (1 before anesthesia and 4 after induction of anesthesia at 10 min. intervals). Surgical procedure began 40 min. after induction. The other 8 were hemodiluted 10 min. after induction. The blood volume withdrawn was 12 ml.kg<sup>-1</sup> over 30 min. Volume substitution was composed of 4 % albumin. The pre and postanesthesia induction measurements were followed by 2 series of measurements (half hemodilution and half end hemodilution). The operation began after hemodilution.

The results are presented as the mean ± SD and the means are compared using a Student (t) test and an Anova (one way, repeated measures associated with Scheffe F-test). A p value < 0.05 is considered statistically significant. The results are summarised in table 1.

Under general anesthesia normovolemic acute hemodilution was not accompanied by an increase in CO and the VO<sub>2</sub>-DO<sub>2</sub> relationships was independent of a non variable level.

Hemodilution induced a sharp drop in DO<sub>2</sub>, associated with a decrease in VO<sub>2</sub> and a rise in O<sub>2</sub> Ext. without an increase in lactacidemy. Everything took place as if hemodilution made VO<sub>2</sub> dependent on DO<sub>2</sub> without any metabolic consequences and with a partial compensation by O<sub>2</sub> Ext. increase.

This state posed no problem for the patient but may be destabilized by metabolic factors or by an organic limitation of an increase in cellular O<sub>2</sub> ext. (2).

**References**

1. Crit Care Med 12 : 540-646, 1983.
2. Chest 13 : 223-229, 1984.

**Table 1**

|                                                          | Before Indu. |            | Ind. + 10 min |            | (H) Half hemo     | (H) End hemo      |
|----------------------------------------------------------|--------------|------------|---------------|------------|-------------------|-------------------|
|                                                          | C            | H          | C             | H          | (C) Ind. + 20 min | (C) Ind. + 30 min |
| HR<br>b.min <sup>-1</sup>                                | 64 ± 06      | 75 ± 15*   | 60 ± 09       | 61 ± 09    | 65 ± 7.2          | 66 ± 07           |
| MAP<br>mm Hg                                             | 92 ± 18      | 93 ± 14*   | 86 ± 10       | 88 ± 11    | 62 ± 10           | 63 ± 12           |
| CI<br>l.min <sup>-1</sup> .m <sup>-2</sup>               | 3.1 ± .6     | 3.2 ± .8*  | 2.6 ± .6      | 2.5 ± .6   | 2.4 ± .6          | 2.5 ± .6          |
| VO <sub>2</sub><br>ml.m <sup>-2</sup> .min <sup>-1</sup> | 114 ± 27     | 127 ± 37*  | 94 ± 22       | 97 ± 20    | 120 ± 49          | 124 ± 20          |
| DO <sub>2</sub><br>ml.m <sup>-2</sup> .min <sup>-1</sup> | 598 ± 112    | 536 ± 157* | 413 ± 116     | 414 ± 113* | 385 ± 122         | 400 ± 112         |
| O <sub>2</sub> Ext.<br>C                                 | .23 ± .03    | .24 ± .07  | .23 ± .01     | .22 ± .05  | .30 ± .05         | .31 ± .05         |
| Lact. Ac<br>mmol                                         | 2.6 ± 1.0    | 2.9 ± 1.1  | 2.5 ± .6      | 3.2 ± 1.1  | 2.5 ± 0.5         | 2.4 ± 0.5         |
|                                                          |              |            |               |            | 3.2 ± 1.4         | 3.2 ± 1.4         |

C : control group      \* \* between groups p < .05 (Student t test)  
H : hemodilution group      \* \* within groups p < .05 (Anova)

**TITLE:** HYPOTHERMIA REDUCES THE CAPACITY FOR FIBRINOLYSIS IN HUMAN PLASMA  
**AUTHORS:** Andrew S Clark, MD, Marcus E Carr, Jr, MD  
**AFFILIATION:** Anesthesia Department, Medical College of Virginia and McGuire VA Medical Center, 1201 Broad Rock Blvd, Richmond, VA 23249

Platelet dysfunction is an unlikely cause of bleeding in clinically relevant hypothermia (1,2). We therefore examined the effect of hypothermia on the capacity for fibrinolysis in humans to determine if a defect in this pathway might explain the development of abnormal bleeding associated with hypothermic patients.

**Methods:** After obtaining institutional approval and patient consents, citrated blood samples were collected at eight time points during cardiac surgery procedures in 16 patients. Fibrin polymer formation in non-heparinized and heparinized samples was induced by adding atroxin (2.5µg/ml) to cuvettes containing 2ml of plasma. Tissue plasminogen activator (0.2µg/ml) then was added to samples that were continuously monitored spectrophotometrically at 633nm and the time for lysis of 50% of the clot was measured (LT50). The temperature of each sample was maintained throughout this analysis at the same temperature of the patient at the time of sampling.

**Results:** Hypothermia during extracorporeal reduced the capacity for fibrinolysis in human plasma by 50% (p<0.01, Figure 1). When patients were rewarmed to 37°C, the LT50 was prolonged by only

11% (p<0.05) and after protamine reversal of heparin, it remained prolonged by 16% (p<0.01). At the end of surgery and after 4 hours in the ICU, the capacity for fibrinolysis in patients had returned to normal.

**Discussion:** These results show that hypothermia inhibits the fibrinolytic capacity of plasmin in human plasma and that this property will not immediately normalize with rewarming. For clinical bleeding to be attributed to increased fibrinolysis in hypothermic patients, circulating levels of plasmin would have to be elevated and/or those of plasmin inhibitors would have to be reduced.

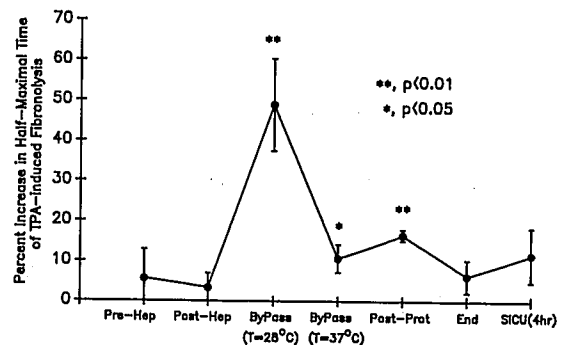

**References:**

- 1) Ann Surg. 205:175, 1987
- 2) Throm. Res. 37:503, 1985
